# Supplementary material for: Evolutionary history of Mycobacterium leprae in the Pacific Islands
Source: Philos Trans R Soc Lond B Biol Sci. 2020 Oct 5;375(1812):20190582. doi: 10.1098/rstb.2019.0582 (PMC7702798; doi:10.1098/rstb.2019.0582)
Supplement: SI Table 2 [file rstb20190582supp7.xlsx]

## Sheet: Extraction and qPCRs
SI Table 2. Summary of sample information, DNA concentration, and qPCR assay results for all samples that were extracted by extraction type
Sample ID	Year of isolation	Type	Bacterial index	DNA Extraction Type	DNA Concentration (ng/ul)	85B	85B Ct mean	85B 1:10	85B 1:10 Ct mean	RLEP	RLEP Ct mean	RLEP 1:10	RLEP 1:10 Ct mean
510	2011	LL	6	DBT	0.544	3/3	35-40	1/3	35-40	3/3	30-35	3/3	30-35
511	2011	LL	5,6	DBT	0.414	3/3	30-35	2/3	35-40	3/3	25-30	3/3	30-35
				DAB	6.68	0/3		0/3		3/3	30-35	3/3	25-30
512	2012	LL	5,6	DBT	0.282	3/3	30-35	3/3	35-40	3/3	25-30	3/3	25-30
513	2016	LL	5	DBT	0.12	1/3	35-40	0/3		3/3	25-30	3/3	30-35
514A1	2011	LL	5,6	DBT	<0.01	3/3	35-40	0/3		3/3	25-30	2/3	30-35
514B1	2011	LL	5,6	DBT	0.1	3/3	30-35(2), 35-40 (1)	1/3	40-45	3/3	25-30	3/3	30-35
515	2011	LL	5	DBT	0.198	3/3	30-35	1/3	40-45	3/3	25-30	3/3	30-35
				DAB	9.96	0/3		0/3		1/3	25-30	3/3	25-30
516	2014	LL	5	DBT	<0.01	3/3	30-35	3/3	35-40	3/3	25-30	3/3	30-35
				DAB	2.56	0/3		0/3		3/3	25-30	3/3	25-30
517	2014	LL	6	DBT	0.436	3/3	30-35	3/3	35-40	3/3	25-30	3/3	25-30
				DAB	6.9	0/3		0/3		3/3	35-40	3/3	25-30
518	2011	BL	5	DBT	0.67	3/3	30-35	3/3	30-35	3/3	20-25	3/3	25-30
				DAB	1.56	0/3		0/3		0/3		3/3	30-35
519	2014	BL	5	DBT	0.26	3/3	30-35	3/3	35-40	3/3	25-30	3/3	30-35
				DAB	6.06	0/3		0/3		0/3		3/3	30-35
520	2015	BL	5	DBT	0.138	3/3	30-35	3/3	30-35(2), 35-40 (1)	3/3	20-25	3/3	25-30
				DAB	2.46	0/3		0/3		0/3		3/3	25-35
521	2012	BL	4,5	DBT	0.692	3/3	35-40	1/3	35-40	3/3	30-35	3/3	30-35
522	2014	BL	3	DBT	0.14	1/3	35-40	1/3	40-45	3/3	30-35	3/3	35-40
523A1	2012	BL	5	DBT	<0.01	3/3	30-35	3/3	35-40	3/3	25-30	3/3	30-35
				DAB	1.75	0/3		0/3		0/3		3/3	25-30
523B1	2012	BL	5	DBT	<0.01	3/3	30-35	3/3	35-40	3/3	25-30	3/3	25-30
524A1	2012	BL	5	DBT	0.112	3/3	30-35	3/3	35-40	3/3	25-30	3/3	30-35
524B1	2016	BL	5	DBT	<0.01	3/3	30-35	3/3	35-40	3/3	25-30	3/3	30-35
525.1	2016	BL	5,6	DBT	<0.01	0/3		0/3		3/3	30-35 (1), 35-40 (2)	2/3	35-40
525.2	2015	BL	5,6	DBT	<0.01	0/3		0/3		3/3	35-40	0/3
526A1	2015	BT	0	DBT	0.138	0/3		0/3		1/3	35-40	0/3
526B1	2011	BT	0	DBT	<0.01	0/3		0/3		1/3	35-40	1/3	35-40
527	2011	BT	0	DBT	<0.01	0/2		0/2		3/3	30-35	1/3	35-40
528	2013	BT/TT	0	DBT	0.116	0/2		0/2		2/3	35-40	0/3
529	2015	BT	0	DBT	<0.01	1/2	35-40	0/2		2/3	35-40	0/3
530	2013	BT	0	DBT	<0.01	0/2		0/2		3/3	35-40	0/3
531	2016	BT	0	DBT	0.236	0/2		0/2		0/3		1/3	35-40
532	2016	BT	0	DBT	<0.01	0/2		0/2		0/3		0/3
533	2016	LL	numerous	DAB	4.38	0/3		1/3	30-35	0/3		0/3
534	1996	LL	abundant	DAB	2.56	0/3		1/3	30-35	0/3		0/3
535	1997	LLs	numerous	DAB	4.7	0/3		1/3	45-50	0/3		0/3
536	1998	LLp	numerous	DAB	18.2	0/3		0/3		0/3		3/3	30-35
537	2000	LL	numerous	DAB	6.3	3/3	30-35	0/3		3/3	45-50	3/3	25-30
538	2008	LL	5-6+	DAB	1.23	1/3	35-40	1/3	35-40	0/3		3/3	35-40
539	1998	BL	numerous	DAB	0.516	3/3	30-35	0/3		3/3	30-35	3/3	30-35
540	2000	BL	6+	DAB	3.28	0/3		0/3		0/3		3/3	30-35
541	2004	BL	5+	DAB	1.31	0/3		0/3		0/3		3/3	40-45
542	2002	BT	2	DAB	0.952	0/3		1/3	35-40	0/3		3/3	35-40
543	2008	BT or BB	3	DAB	2.98	0/3		0/3		0/3		3/3	35-40
	Blevins et al., Evolutionary history of Mycobacterium leprae in the Pacific Islands
