# Supplementary material for: Evolutionary history of Mycobacterium leprae in the Pacific Islands
Source: Philos Trans R Soc Lond B Biol Sci. 2020 Oct 5;375(1812):20190582. doi: 10.1098/rstb.2019.0582 (PMC7702798; doi:10.1098/rstb.2019.0582)
Supplement: SI Table 3 [file rstb20190582supp8.xlsx]

## Sheet: Sheet1
SI Table 3. Mapping, fragment length, and DNA damage comparison between samples extracted with DBT and samples extracted with DAB + UDG treatment
Sample ID	Extraction type	Non-duplicate, uniquely mapped reads	Average depth of coverage (X)	Average depth of coverage after concatenation (X)	% reference covered >= 1X	% reference covered >= 5X	% reference covered >= 5X after contatenation	Average fragment length (bp)	Endogenous content (%)	G to A misincorporation 1st Base 3'	G to A misincorporation 2nd Base 3'	C to T misincorporation 1st Base 5'	C to T misincorporation Base 5'
511	DBT	214347	3.9	9.8	90	36	77	59	7	0.025	0.028	0.025	0.029
	DAB + UDG treatment	392563	6.3		93	57		53	16	0.014	0.003	0.013	0.002
515	DBT	141547	2.4	10.1	80	16	73	56	14	0.035	0.034	0.037	0.037
	DAB + UDG treatment	519658	7.9		93	62		50	15	0.022	0.004	0.022	0.004
519	DBT	281024	5.5	10.3	97	62	87	65	48	0.022	0.023	0.023	0.023
	DAB + UDG treatment	283067	5		91	47		59	14	0.025	0.004	0.027	0.004
523A1	DBT	128277	2.6	4.3	88	16	43	68	11	0.015	0.016	0.016	0.018
	DAB + UDG treatment	117842	1.7		77	5		48	33	0.034	0.012	0.034	0.012
Blevins et al., Evolutionary history of Mycobacterium leprae in the Pacific Islands
