# Supplementary material for: Evolutionary history of Mycobacterium leprae in the Pacific Islands
Source: Philos Trans R Soc Lond B Biol Sci. 2020 Oct 5;375(1812):20190582. doi: 10.1098/rstb.2019.0582 (PMC7702798; doi:10.1098/rstb.2019.0582)
Supplement: SI Table 6 [file rstb20190582supp11.xlsx]

## Sheet: Sheet1
SI Table 6. List of unique SNPs by sample with their effect
Sample	Branch	Position	Reference	Change	Change_type	Homozygous	Gene_ID	Gene_name	Trancript_ID	Effect	old_AA/new_AA	Old_codon/New_codon	Codon_Num(CDS)	Codon_Degeneracy	CDS_size
516	0	2295700	C	G	SNP	Hom	ML1912	ML1912	ML1912	SYNONYMOUS_CODING	L/L	ctC/ctG	59	4	717
516	0	2858414	G	T	SNP	Hom	ML2388	ML2388	ML2388	NON_SYNONYMOUS_CODING	G/V	gGa/gTa	38	1	306
518	0	2126616	T	C	SNP	Hom	ML1753	ML1753	ML1753	NON_SYNONYMOUS_CODING	Q/R	cAa/cGa	158	1	3321
518	0	2866273	C	T	SNP	Hom	ML2396	cysM2	ML2396	NON_SYNONYMOUS_CODING	R/H	cGc/cAc	354	1	1395
520	0	2866273	C	T	SNP	Hom	ML2396	cysM2	ML2396	NON_SYNONYMOUS_CODING	R/H	cGc/cAc	354	1	1395
515	5	3198473	T	A	SNP	Hom	ML2670	ML2670	ML2670	NON_SYNONYMOUS_CODING	I/F	Att/Ttt	497	1	2001
517	5	21212	G	A	SNP	Hom	ML0017	pknA	ML0017	SYNONYMOUS_CODING	R/R	cgC/cgT	327	4	1314
517	5	1264091	G	T	SNP	Hom	ML1096	ML1096	ML1096	SYNONYMOUS_CODING	G/G	ggC/ggA	172	4	675
517	5	1190845	C	T	SNP	Hom	ML1022	rpoT	ML1022	NON_SYNONYMOUS_CODING	R/Q	cGa/cAa	22	1	1725
Blevins et al., Evolutionary history of Mycobacterium leprae in the Pacific Islands
