# Supplementary material for: Evolutionary history of Mycobacterium leprae in the Pacific Islands
Source: Philos Trans R Soc Lond B Biol Sci. 2020 Oct 5;375(1812):20190582. doi: 10.1098/rstb.2019.0582 (PMC7702798; doi:10.1098/rstb.2019.0582)
Supplement: SI Table 7 [file rstb20190582supp12.xlsx]

## Sheet: Branch_5
SI Table 7. Branch defining nonsynonymous SNPs and nonsynonymous SNPs unique to the genomes produced in this study
Position	Non-synonymous SNP distribution	Ref	Samples from this study				US57 (Marshall Islands)	Ryukyu-2 (Japan)	Branch	Position	Reference	Change	Gene_ID	Gene_name	Trancript_ID	Effect	old_AA/new_AA	Old_codon/New_codon	Codon_Num(CDS)	CDS_size	Gene product/function
			515	536	523A1	517
62545	Branch 5 defining	G	N	N	T	T	T	T	5	62545	G	T	ML0051	ML0051	ML0051	NON_SYNONYMOUS_CODING	P/T	Ccg/Acg	189	909	PPE family protein
315317	Branch 5 defining	G	N	N	N	A	A	A	5	315317	G	A	ML0240	ML0240	ML0240	NON_SYNONYMOUS_CODING	A/T	Gcg/Acg	124	1128	Probable resuscitation-promoting factor RpfB
328634	Branch 5 defining	G	C	N	N	C	N	C	5	328634	G	C	ML0252	mfd	ML0252	NON_SYNONYMOUS_CODING	V/L	Gtc/Ctc	190	3675	Probable transcription-repair coupling factor Mfd (trcF)
365435	Branch 5 defining	G	A	N	N	A	A	A	5	365435	G	A	ML0283	ML0283	ML0283	NON_SYNONYMOUS_CODING	A/T	Gcg/Acg	174	807	Possible cation-efflux transporter component
1532258	Branch 5 defining	G	N	N	N	A	A	A	5	1532258	G	A	ML1286	ML1286	ML1286	NON_SYNONYMOUS_CODING	R/Q	cGg/cAg	131	618	Probable two-component system transcriptional regulator
2030803	Branch 5 defining	G	A	N	N	A	A	A	5	2030803	G	A	ML1685	leuC	ML1685	NON_SYNONYMOUS_CODING	A/V	gCc/gTc	276	1458	Probable 3-isopropylmalate dehydratase (large subunit)
2441339	Branch 5 defining	C	N	N	N	T	T	T	5	2441339	C	T	ML2053	ML2053	ML2053	NON_SYNONYMOUS_CODING	A/T	Gcg/Acg	256	1008	Probable alcohol dehydrogenase AdhA
2468130	Branch 5 defining	C	N	N	N	A	A	A	5	2468130	C	A	ML2075	ML2075	ML2075	NON_SYNONYMOUS_CODING	V/F	Gtc/Ttc	204	756	Hypothetical protein
3191340	Branch 5 defining	G	A	A	N	A	A	A	5	3191340	G	A	ML2664	ML2664	ML2664	NON_SYNONYMOUS_CODING	G/E	gGg/gAg	189	756	Possible conserved membrane protein
738610	Pacific Island clade defining	G	T	T	N	.	T	.	5	738610	G	T	ML0606	ML0606	ML0606	NON_SYNONYMOUS_CODING	G/V	gGt/gTt	126	978	Hypothetical protein
807196	Pacific Island clade defining	C	T	N	T	.	T	.	5	807196	C	T	ML0670	ftsX	ML0670	NON_SYNONYMOUS_CODING	A/V	gCc/gTc	196	894	Cell division protein
1423393	Pacific Island clade defining	A	G	G	N	.	G	.	5	1423393	A	G	ML1207	dnaE	ML1207	NON_SYNONYMOUS_CODING	E/G	gAg/gGg	127	3534	DNA polymerase III subunit alpha
3068704	Pacific Island clade defining	G	A	A	N	.	A	.	5	3068704	G	A	ML2570	ML2570	ML2570	NON_SYNONYMOUS_CODING	D/N	Gat/Aat	1050	4218	Hypothetical protein
1190845	Unique to genomes from this study	C	.	.	N	T	.	.	5	1190845	C	T	ML1022	rpoT	ML1022	NON_SYNONYMOUS_CODING	R/Q	cGa/cAa	22	1725	RNA polymerase sigma factor
3198473	Unique to genomes from this study	T	A	N	.	.	.	.	5	3198473	T	A	ML2670	ML2670	ML2670	NON_SYNONYMOUS_CODING	I/F	Att/Ttt	497	2001	Hypothetical protein
Blevins et al., Evolutionary history of Mycobacterium leprae in the Pacific Islands

## Sheet: Branch_0
SI Table 7. Branch defining nonsynonymous SNPs and nonsynonymous SNPs unique to the genomes produced in this study
Position	Non-synonymous SNP distribution	Ref	Pacfic Island clade						CM1 (Phillipines, crab-eating macaque)	Position	Reference	Change	Gene_ID	Gene_name	Trancript_ID	Effect	old_AA/new_AA	Old_codon/New_codon	Codon_Num(CDS)	CDS_size	Gene product/function
			511	516	518	519	520	S9-96008
509178	Branch 0 defining	G	A	A	A	A	A	A	A	509178	G	A	ML0411	ML0411	ML0411	NON_SYNONYMOUS_CODING	D/N	Gat/Aat	142	1227	Serine-rich antigen
509851	Branch 0 defining	G	N	T	T	N	T	T	T	509851	G	T	ML0411	ML0411	ML0411	NON_SYNONYMOUS_CODING	G/V	gGc/gTc	366	1227	Serine-rich antigen
563796	Branch 0 defining	G	C	C	C	C	C	C	C	563796	G	C	ML0466	ML0466	ML0466	NON_SYNONYMOUS_CODING	E/D	gaG/gaC	55	906	Possible secreted protein
966690	Branch 0 defining	G	C	C	C	C	C	C	C	966690	G	C	ML0817	moeZ	ML0817	NON_SYNONYMOUS_CODING	R/T	aGg/aCg	254	1188	Probable molybdenum cofactor biosynthesis protein
1262010	Branch 0 defining	T	C	C	C	C	C	C	C	1262010	T	C	ML1095	kgd	ML1095	NON_SYNONYMOUS_CODING	T/A	Aca/Gca	579	3717	Probable 2-oxoglutarate dehydrogenase
1665902	Branch 0 defining	G	N	C	C	C	C	C	C	1665902	G	C	ML1389	ML1389	ML1389	NON_SYNONYMOUS_CODING	P/A	Ccc/Gcc	286	1584	Probable conserved transmembrane protein
1937233	Branch 0 defining	G	A	A	A	A	A	A	N	1937233	G	A	ML1613	rplS	ML1613	NON_SYNONYMOUS_CODING	P/L	cCg/cTg	74	342	Probable 50S ribosomal protein L19
2175587	Branch 0 defining	C	G	G	G	G	G	G	G	2175587	C	G	ML1796	ML1796	ML1796	NON_SYNONYMOUS_CODING	Q/E	Caa/Gaa	96	414	Hypothetical protein
2388071	Branch 0 defining	G	N	C	C	C	C	C	C	2388071	G	C	ML1997	ML1997	ML1997	NON_SYNONYMOUS_CODING	P/A	Ccg/Gcg	32	633	Probable conserved integral membrane protein
2822967	Branch 0 defining	A	G	G	G	G	G	G	G	2822967	A	G	ML2358	fadD26	ML2358	NON_SYNONYMOUS_CODING	F/S	tTt/tCt	164	1752	Fatty-acid-CoA ligase
451	Pacific Island clade defining	G	A	A	A	A	A	A	.	451	G	A	ML0001	dnaA	ML0001	NON_SYNONYMOUS_CODING	G/R	Ggg/Agg	151	1566	Chromosome replication initiator
18544	Pacific Island clade defining	G	N	A	A	N	A	A	.	18544	G	A	ML0015	pabA	ML0015	NON_SYNONYMOUS_CODING	A/T	Gcg/Acg	74	699	Para-aminobenzoate synthase
199244	Pacific Island clade defining	C	A	A	A	A	A	A	.	199244	C	A	ML0139	mas	ML0139	NON_SYNONYMOUS_CODING	T/K	aCa/aAa	1675	6351	Mycocerosic synthase
222056	Pacific Island clade defining	G	A	A	A	A	A	A	.	222056	G	A	ML0158	ML0158	ML0158	NON_SYNONYMOUS_CODING	A/T	Gca/Aca	134	945	Hypothetical protein
289884	Pacific Island clade defining	G	C	C	C	C	C	C	.	289884	G	C	ML0218	ML0218	ML0218	NON_SYNONYMOUS_CODING	T/S	aCc/aGc	111	387	Hypothetical protein
363480	Pacific Island clade defining	G	T	T	T	T	T	T	.	363480	G	T	ML0281	ML0281	ML0281	NON_SYNONYMOUS_CODING	D/Y	Gac/Tac	17	690	Hypothetical protein
405173	Pacific Island clade defining	G	N	N	A	N	A	A	.	405173	G	A	ML0316	ML0316	ML0316	NON_SYNONYMOUS_CODING	G/D	gGc/gAc	156	603	TetR/AcrR family transcriptional regulator
496266	Pacific Island clade defining	C	T	T	T	T	T	T	.	496266	C	A	ML0398	ML0398	ML0398	NON_SYNONYMOUS_CODING	A/S	Gcc/Tcc	278	1038	D-ribose-binding protein
553273	Pacific Island clade defining	C	A	A	A	A	A	A	.	553273	C	A	ML0452	ML0452	ML0452	NON_SYNONYMOUS_CODING	R/L	cGg/cTg	31	1125	Glycosyltransferase
659431	Pacific Island clade defining	G	C	C	C	N	C	C	.	659431	G	C	ML0543	dfp	ML0543	NON_SYNONYMOUS_CODING	D/H	Gac/Cac	367	1260	Coenzyme A biosynthesis bifunctional protein
836098	Pacific Island clade defining	G	A	A	A	A	A	A	.	836098	G	A	ML0697	sdhA	ML0697	NON_SYNONYMOUS_CODING	P/L	cCc/cTc	108	1755	Succinate dehydrogenase
1089199	Pacific Island clade defining	A	G	G	G	N	G	G	.	1089199	A	G	ML0918	ML0918	ML0918	NON_SYNONYMOUS_CODING	M/V	Atg/Gtg	248	750	Hypothetical protein
1532344	Pacific Island clade defining	G	T	T	T	T	T	T	.	1532344	G	T	ML1286	ML1286	ML1286	NON_SYNONYMOUS_CODING	G/C	Ggc/Tgc	160	618	Possible two-component response regulatory protein
1587096	Pacific Island clade defining	G	N	A	A	A	A	A	.	1587096	G	A	ML1333	helY	ML1333	NON_SYNONYMOUS_CODING	G/S	Ggt/Agt	868	2763	Probable helicase
1926909	Pacific Island clade defining	C	G	G	G	G	G	G	.	1926909	C	G	ML1601	ML1601	ML1601	NON_SYNONYMOUS_CODING	D/H	Gat/Cat	71	366	Hypothetical protein
2274434	Pacific Island clade defining	C	N	T	T	T	T	T	.	2274434	C	T	ML1891	rpoB	ML1891	NON_SYNONYMOUS_CODING	R/Q	cGg/cAg	791	3537	DNA-directed RNA polymerase
2376085	Pacific Island clade defining	G	A	A	A	A	A	A	.	2376085	G	A	ML1988	ML1988	ML1988	NON_SYNONYMOUS_CODING	R/C	Cgc/Tgc	112	714	Hypothetical protein
2678287	Pacific Island clade defining	G	A	A	A	A	A	A	.	2678287	G	A	ML2254	otsA	ML2254	NON_SYNONYMOUS_CODING	R/Q	cGa/cAa	342	1497	Trehalose-6-phosphate synthase
3241125	Pacific Island clade defining	G	N	A	A	N	A	A	.	3241125	G	A	ML2691	ML2691	ML2691	NON_SYNONYMOUS_CODING	E/K	Gaa/Aaa	110	543	Hypothetical protein
3256240	Pacific Island clade defining	C	T	T	T	T	T	T	.	3256240	C	T	ML2700	ML2700	ML2700	NON_SYNONYMOUS_CODING	P/S	Ccc/Tcc	1062	3621	Possible conserved membrane protein
365117	Pacific Island clade + crab-eating macaque	A	C	C	C	C	C	C	C	365117	A	C	ML0283	ML0283	ML0283	NON_SYNONYMOUS_CODING	T/P	Acc/Ccc	68	807	Putative cation-efflux transporter component
1402551	Pacific Island clade + crab-eating macaque	A	G	G	G	G	G	G	G	1402551	A	G	ML1191	fas	ML1191	NON_SYNONYMOUS_CODING	Q/R	cAg/cGg	1977	9231	Fatty acid synthase
2801445	Pacific Island clade + crab-eating macaque	G	N	A	A	N	A	A	A	2801445	G	A	ML2354	ML2354	ML2354	NON_SYNONYMOUS_CODING	S/L	tCg/tTg	1143	5469	Polyketide synthase
2126616	Unique to genomes from this study	T	.	.	C	.	.	.	.	2126616	T	C	ML1753	ML1753	ML1753	NON_SYNONYMOUS_CODING	Q/R	cAa/cGa	158	3321	Possible transcriptional regulator
2858414	Unique to genomes from this study	G	.	T	.	.	.	.	.	2858414	G	T	ML2388	ML2388	ML2388	NON_SYNONYMOUS_CODING	G/V	gGa/gTa	38	306	Hypothetical protein
2866273	Unique to genomes from this study	C	N	N	T	N	T	.	N	2866273	C	T	ML2396	cysM2	ML2396	NON_SYNONYMOUS_CODING	R/H	cGc/cAc	354	1395	Cystathionine beta-synthase
Blevins et al., Evolutionary history of Mycobacterium leprae in the Pacific Islands
